# Supplementary material
Source: MDPI journal article supplement (https://www.mdpi.com/1999-4907/12/5/636)
Supplement: s1 [file s1]

Table S1. F - test for examined biochemical parameters in black poplar clones on different concentrations of NaCl

| Sources of variation    | Biochemical parameters <sup>1)</sup> |          |            |           |           |            |
|-------------------------|--------------------------------------|----------|------------|-----------|-----------|------------|
|                         | TPC                                  | TFC      | PC         | GBC       | FPR       | DPPH       |
| Salt concentration (A)  | 5.982 ** 2)                          | 4.296 *  | 185.790 ** | 6.516 **  | 8.963 **  | 49.681 **  |
| Clone (B)               | 11.126 **                            | 1.796    | 58.570 **  | 2.191     | 32.812 ** | 11.713 **  |
| Interaction A×B         | 1.760                                | 2.806 *  | 151.120 ** | 1.543     | 10.427 ** | 11.923 **  |
| Time of measurement (R) | 11.257 **                            | 7.297 ** | 37.360 **  | 21.080 ** | 16.989 ** | 438.392 ** |
| Interaction A×R         | 10.457 **                            | 6.915 ** | 27.660 **  | 7.126 **  | 9.984 **  | 45.314 **  |
| Interaction A×B         | 3.553 **                             | 3.859 ** | 23.400 **  | 8.675 **  | 13.569 ** | 35.426 **  |
| Interaction A×B×R       | 3.260 **                             | 2.337 ** | 14.430 **  | 9.068 **  | 11.968 ** | 33.291 **  |

<sup>1)</sup> Labels of biochemical parameter: DPPH - DPPH scavenging activity; TPC - Total phenolics content; TFC - Total flavonoids content; PC - Prolin content; GBC - Glicine betain content; FPR - Flavonoides/Phenolics ratio

<sup>2)</sup> Labels for F-test: \* - significant at p=0.05, \*\* - significant at p=0.01

Table S2. Tukey HSD test for biochemical parameters in black poplar clones on examined salt concentrations in the first 24 hours

| Clone    | c(NaCl) (mM) | Time (hours) | Biochemical parameters <sup>1)</sup> |                        |                       |                       |                      |                       |
|----------|--------------|--------------|--------------------------------------|------------------------|-----------------------|-----------------------|----------------------|-----------------------|
|          |              |              | TPC (mg GAE/g DW)                    | TFC (mg QE/g DW)       | PC (μM/g DW)          | GBC (μM/g DW)         | FPR                  | DPPH (mM TEAC)        |
| Bora     |              |              | 4.823 <sup>b</sup>                   | 7.959 <sup>b</sup>     | 6.423 <sup>a</sup>    | 31.427 <sup>a</sup>   | 1.946 <sup>a</sup>   | 0.565 <sup>b</sup>    |
| Antonije |              |              | 4.654 <sup>b</sup>                   | 8.574 <sup>ab</sup>    | 5.626 <sup>b</sup>    | 32.046 <sup>a</sup>   | 2.070 <sup>a</sup>   | 0.561 <sup>b</sup>    |
| Pannonia |              |              | 5.460 <sup>a</sup>                   | 8.535 <sup>ab</sup>    | 4.699 <sup>c</sup>    | 33.697 <sup>a</sup>   | 1.537 <sup>b</sup>   | 0.596 <sup>ab</sup>   |
| PE19/66  |              |              | 5.707 <sup>a</sup>                   | 9.187 <sup>a</sup>     | 5.327 <sup>b</sup>    | 29.297 <sup>a</sup>   | 1.669 <sup>b</sup>   | 0.646 <sup>a</sup>    |
|          | 0            |              | 5.380 <sup>a</sup>                   | 8.895 <sup>a</sup>     | 5.448 <sup>b</sup>    | 35.192 <sup>a</sup>   | 1.708 <sup>b</sup>   | 0.515 <sup>b</sup>    |
|          | 150          |              | 4.825 <sup>ab</sup>                  | 9.152 <sup>a</sup>     | 4.561 <sup>c</sup>    | 22.784 <sup>b</sup>   | 1.950 <sup>a</sup>   | 0.703 <sup>a</sup>    |
|          | 300          |              | 4.555 <sup>b</sup>                   | 8.575 <sup>ab</sup>    | 4.758 <sup>c</sup>    | 30.239 <sup>ab</sup>  | 1.976 <sup>a</sup>   | 0.498 <sup>b</sup>    |
|          | 450          |              | 5.447 <sup>a</sup>                   | 7.627 <sup>b</sup>     | 7.352 <sup>a</sup>    | 31.101 <sup>ab</sup>  | 1.669 <sup>b</sup>   | 0.698 <sup>a</sup>    |
|          |              | 03           | 5.290 <sup>a</sup>                   | 8.975 <sup>ab</sup>    | 5.036 <sup>bc</sup>   | 29.759 <sup>c</sup>   | 1.987 <sup>a</sup>   | 0.562 <sup>b</sup>    |
|          |              | 08           | 5.347 <sup>a</sup>                   | 7.984 <sup>bc</sup>    | 5.670 <sup>b</sup>    | 24.754 <sup>d</sup>   | 1.535 <sup>c</sup>   | 0.801 <sup>a</sup>    |
|          |              | 12           | 4.937 <sup>a</sup>                   | 7.711 <sup>c</sup>     | 6.974 <sup>a</sup>    | 33.625 <sup>b</sup>   | 1.768 <sup>b</sup>   | 0.464 <sup>c</sup>    |
|          |              | 24           | 5.070 <sup>a</sup>                   | 9.727 <sup>a</sup>     | 4.421 <sup>c</sup>    | 38.329 <sup>a</sup>   | 1.960 <sup>a</sup>   | 0.546 <sup>b</sup>    |
| Bora     | 0            |              | 5.347 <sup>abcd</sup>                | 7.306 <sup>ab</sup>    | 4.908 <sup>efg</sup>  | 39.329 <sup>a</sup>   | 1.779 <sup>cde</sup> | 0.437 <sup>fg</sup>   |
| Bora     | 150          |              | 4.267 <sup>bcd</sup>                 | 8.989 <sup>ab</sup>    | 4.081 <sup>fgh</sup>  | 19.720 <sup>a</sup>   | 2.191 <sup>abc</sup> | 0.828 <sup>ab</sup>   |
| Bora     | 300          |              | 3.947 <sup>d</sup>                   | 8.421 <sup>ab</sup>    | 3.900 <sup>hi</sup>   | 21.011 <sup>a</sup>   | 2.228 <sup>abc</sup> | 0.339 <sup>g</sup>    |
| Bora     | 450          |              | 4.684 <sup>abcd</sup>                | 7.122 <sup>ab</sup>    | 12.805 <sup>a</sup>   | 29.845 <sup>a</sup>   | 1.586 <sup>de</sup>  | 0.658 <sup>bcd</sup>  |
| Antonije | 0            |              | 4.966 <sup>abcd</sup>                | 8.352 <sup>ab</sup>    | 5.673 <sup>cde</sup>  | 31.312 <sup>a</sup>   | 1.595 <sup>de</sup>  | 0.525 <sup>cdef</sup> |
| Antonije | 150          |              | 4.461 <sup>abcd</sup>                | 9.728 <sup>ab</sup>    | 4.906 <sup>efg</sup>  | 25.496 <sup>a</sup>   | 2.193 <sup>abc</sup> | 0.685 <sup>bc</sup>   |
| Antonije | 300          |              | 4.054 <sup>cd</sup>                  | 9.689 <sup>ab</sup>    | 6.077 <sup>bc</sup>   | 37.826 <sup>a</sup>   | 2.573 <sup>a</sup>   | 0.476 <sup>efg</sup>  |
| Antonije | 450          |              | 4.509 <sup>abcd</sup>                | 6.749 <sup>b</sup>     | 5.802 <sup>cde</sup>  | 35.017 <sup>a</sup>   | 2.391 <sup>ab</sup>  | 0.593 <sup>cdef</sup> |
| Pannonia | 0            |              | 5.198 <sup>abcd</sup>                | 8.927 <sup>ab</sup>    | 5.033 <sup>def</sup>  | 35.185 <sup>a</sup>   | 1.713 <sup>cde</sup> | 0.584 <sup>cdef</sup> |
| Pannonia | 150          |              | 5.602 <sup>abcd</sup>                | 8.331 <sup>ab</sup>    | 3.736 <sup>hi</sup>   | 25.705 <sup>a</sup>   | 1.479 <sup>de</sup>  | 0.634 <sup>cde</sup>  |
| Pannonia | 300          |              | 5.237 <sup>abcd</sup>                | 7.809 <sup>ab</sup>    | 6.048 <sup>bc</sup>   | 35.507 <sup>a</sup>   | 1.489 <sup>de</sup>  | 0.540 <sup>cdef</sup> |
| Pannonia | 450          |              | 6.326 <sup>a</sup>                   | 9.072 <sup>ab</sup>    | 3.980 <sup>ghi</sup>  | 35.414 <sup>a</sup>   | 1.468 <sup>de</sup>  | 0.627 <sup>cde</sup>  |
| PE19/66  | 0            |              | 6.009 <sup>abc</sup>                 | 10.216 <sup>a</sup>    | 5.955 <sup>bcd</sup>  | 34.942 <sup>a</sup>   | 1.783 <sup>cde</sup> | 0.509 <sup>defg</sup> |
| PE19/66  | 150          |              | 4.969 <sup>abcd</sup>                | 9.561 <sup>ab</sup>    | 5.522 <sup>cde</sup>  | 20.215 <sup>a</sup>   | 1.938 <sup>bcd</sup> | 0.664 <sup>bcd</sup>  |
| PE19/66  | 300          |              | 4.982 <sup>abcd</sup>                | 8.380 <sup>ab</sup>    | 3.008 <sup>i</sup>    | 26.614 <sup>a</sup>   | 1.614 <sup>de</sup>  | 0.635 <sup>cde</sup>  |
| PE19/66  | 450          |              | 6.268 <sup>ab</sup>                  | 7.564 <sup>ab</sup>    | 6.823 <sup>b</sup>    | 24.129 <sup>a</sup>   | 1.230 <sup>e</sup>   | 0.914 <sup>a</sup>    |
|          | 0            | 03           | 5.704 <sup>abc</sup>                 | 9.303 <sup>abcd</sup>  | 5.735 <sup>bcde</sup> | 30.172 <sup>bde</sup> | 1.749 <sup>bc</sup>  | 0.499 <sup>f</sup>    |
|          | 0            | 08           | 4.630 <sup>defg</sup>                | 6.427 <sup>ef</sup>    | 7.252 <sup>bc</sup>   | 29.033 <sup>bde</sup> | 1.500 <sup>c</sup>   | 0.565 <sup>de</sup>   |
|          | 0            | 12           | 5.806 <sup>ab</sup>                  | 9.047 <sup>abcde</sup> | 3.937 <sup>fgh</sup>  | 37.672 <sup>ac</sup>  | 1.725 <sup>bc</sup>  | 0.469 <sup>f</sup>    |
|          | 0            | 24           | 5.380 <sup>abcde</sup>               | 10.803 <sup>a</sup>    | 4.869 <sup>defg</sup> | 43.892 <sup>a</sup>   | 1.858 <sup>abc</sup> | 0.526 <sup>ef</sup>   |
|          | 150          | 03           | 5.208 <sup>bcdef</sup>               | 9.685 <sup>abc</sup>   | 2.862 <sup>h</sup>    | 24.208 <sup>cde</sup> | 1.913 <sup>abc</sup> | 0.684 <sup>bc</sup>   |

|          |     |    |                            |                         |                                   |                                |                            |                                  |
|----------|-----|----|----------------------------|-------------------------|-----------------------------------|--------------------------------|----------------------------|----------------------------------|
|          | 150 | 08 | 5.598 <sup>abcde</sup>     | 11.092 <sup>a</sup>     | 4.630 <sup>efgh</sup>             | 19.201 <sup>de</sup>           | 2.093 <sup>ab</sup>        | 1.047 <sup>a</sup>               |
|          | 150 | 12 | 3.453 <sup>g</sup>         | 6.729 <sup>cdef</sup>   | 7.358 <sup>b</sup>                | 23.906 <sup>cde</sup>          | 1.980 <sup>abc</sup>       | 0.544 <sup>ef</sup>              |
|          | 150 | 24 | 5.040 <sup>bcdef</sup>     | 9.102 <sup>abcde</sup>  | 3.394 <sup>gh</sup>               | 23.821 <sup>cde</sup>          | 1.815 <sup>abc</sup>       | 0.536 <sup>ef</sup>              |
|          | 300 | 03 | 4.814 <sup>bcdefe</sup>    | 9.503 <sup>abcde</sup>  | 5.552 <sup>cdef</sup>             | 21.495 <sup>de</sup>           | 2.101 <sup>ab</sup>        | 0.446 <sup>f</sup>               |
|          | 300 | 08 | 5.685 <sup>abd</sup>       | 10.060 <sup>ab</sup>    | 3.833 <sup>fgh</sup>              | 25.621 <sup>cde</sup>          | 1.788 <sup>abc</sup>       | 0.769 <sup>b</sup>               |
|          | 300 | 12 | 3.621 <sup>fg</sup>        | 6.125 <sup>def</sup>    | 4.868 <sup>defg</sup>             | 32.178 <sup>abcde</sup>        | 1.742 <sup>bc</sup>        | 0.307 <sup>g</sup>               |
|          | 300 | 24 | 4.100 <sup>cefg</sup>      | 8.610 <sup>abcde</sup>  | 4.781 <sup>efg</sup>              | 41.664 <sup>ab</sup>           | 2.273 <sup>a</sup>         | 0.469 <sup>ef</sup>              |
|          | 450 | 03 | 4.606 <sup>bcdefe</sup>    | 7.248 <sup>bcdef</sup>  | 5.821 <sup>bcde</sup>             | 42.339 <sup>ab</sup>           | 2.304 <sup>a</sup>         | 0.653 <sup>cd</sup>              |
|          | 450 | 08 | 6.911 <sup>a</sup>         | 5.133 <sup>f</sup>      | 6.569 <sup>bcd</sup>              | 16.603 <sup>e</sup>            | 0.777 <sup>d</sup>         | 0.943 <sup>a</sup>               |
|          | 450 | 12 | 5.129 <sup>bcdef</sup>     | 8.272 <sup>abcdef</sup> | 12.493 <sup>a</sup>               | 32.649 <sup>abcd</sup>         | 1.648 <sup>bc</sup>        | 0.535 <sup>ef</sup>              |
|          | 450 | 24 | 5.142 <sup>bcdef</sup>     | 9.854 <sup>abc</sup>    | 4.526 <sup>efgh</sup>             | 32.814 <sup>abcd</sup>         | 1.945 <sup>abc</sup>       | 0.662 <sup>cd</sup>              |
| Bora     |     | 03 | 4.807 <sup>abc</sup>       | 9.288 <sup>abcd</sup>   | 4.143 <sup>ef</sup>               | 31.360 <sup>bcde</sup>         | 2.038 <sup>bcd</sup>       | 0.595 <sup>ce</sup>              |
| Bora     |     | 08 | 4.440 <sup>c</sup>         | 7.014 <sup>bcd</sup>    | 4.324 <sup>def</sup>              | 23.758 <sup>de</sup>           | 1.626 <sup>de</sup>        | 0.692 <sup>b</sup>               |
| Bora     |     | 12 | 5.020 <sup>abc</sup>       | 7.361 <sup>bcd</sup>    | 11.480 <sup>a</sup>               | 39.854 <sup>abc</sup>          | 2.347 <sup>ab</sup>        | 0.466 <sup>fghi</sup>            |
| Bora     |     | 24 | 5.025 <sup>abc</sup>       | 8.174 <sup>bcd</sup>    | 5.746 <sup>cde</sup>              | 30.737 <sup>bcde</sup>         | 1.772 <sup>cde</sup>       | 0.509 <sup>dfgh</sup>            |
| Antonije |     | 03 | 4.457 <sup>c</sup>         | 9.080 <sup>abcd</sup>   | 6.054 <sup>bcd</sup>              | 33.597 <sup>bcde</sup>         | 2.721 <sup>a</sup>         | 0.485 <sup>ghi</sup>             |
| Antonije |     | 08 | 4.798 <sup>abc</sup>       | 6.520 <sup>cd</sup>     | 7.205 <sup>bc</sup>               | 32.204 <sup>bcde</sup>         | 1.494 <sup>e</sup>         | 0.674 <sup>bc</sup>              |
| Antonije |     | 12 | 4.922 <sup>abc</sup>       | 8.633 <sup>bcd</sup>    | 4.815 <sup>def</sup>              | 32.303 <sup>bcde</sup>         | 1.816 <sup>cde</sup>       | 0.530 <sup>defgh</sup>           |
| Antonije |     | 24 | 4.439 <sup>c</sup>         | 10.063 <sup>ab</sup>    | 4.430 <sup>def</sup>              | 30.080 <sup>cde</sup>          | 2.248 <sup>bc</sup>        | 0.555 <sup>def</sup>             |
| Pannonia |     | 03 | 5.988 <sup>a</sup>         | 9.503 <sup>abc</sup>    | 5.270 <sup>def</sup>              | 32.481 <sup>bcd</sup>          | 1.503 <sup>e</sup>         | 0.479 <sup>fgh</sup>             |
| Pannonia |     | 08 | 6.027 <sup>a</sup>         | 10.165 <sup>ab</sup>    | 5.267 <sup>def</sup>              | 21.232 <sup>e</sup>            | 1.628 <sup>de</sup>        | 0.909 <sup>a</sup>               |
| Pannonia |     | 12 | 4.567 <sup>bc</sup>        | 6.065 <sup>d</sup>      | 4.363 <sup>def</sup>              | 32.038 <sup>bcd</sup>          | 1.339 <sup>e</sup>         | 0.397 <sup>i</sup>               |
| Pannonia |     | 24 | 5.258 <sup>abc</sup>       | 8.406 <sup>bcd</sup>    | 3.897 <sup>f</sup>                | 49.036 <sup>a</sup>            | 1.679 <sup>de</sup>        | 0.600 <sup>bcde</sup>            |
| PE19/66  |     | 03 | 5.909 <sup>ab</sup>        | 8.199 <sup>bcd</sup>    | 4.423 <sup>def</sup>              | 21.600 <sup>de</sup>           | 1.600 <sup>de</sup>        | 0.681 <sup>bc</sup>              |
| PE19/66  |     | 08 | 6.124 <sup>a</sup>         | 8.478 <sup>bcd</sup>    | 5.500 <sup>cdef</sup>             | 21.822 <sup>de</sup>           | 1.429 <sup>e</sup>         | 0.930 <sup>a</sup>               |
| PE19/66  |     | 12 | 5.237 <sup>abc</sup>       | 8.384 <sup>bcd</sup>    | 7.777 <sup>b</sup>                | 30.304 <sup>cde</sup>          | 1.602 <sup>de</sup>        | 0.452 <sup>hi</sup>              |
| PE19/66  |     | 24 | 5.559 <sup>abc</sup>       | 11.689 <sup>a</sup>     | 3.608 <sup>f</sup>                | 43.463 <sup>ab</sup>           | 2.047 <sup>bcd</sup>       | 0.522 <sup>defg</sup>            |
| Bora     | 0   | 03 | 5.039 <sup>ihgfedcba</sup> | 9.571 <sup>abcd</sup>   | 1.897 <sup>wvutr</sup>            | 25.550 <sup>ljhgfc</sup>       | 2.075 <sup>ijhgfedc</sup>  | 0.606 <sup>vtsrponmlkjih</sup>   |
| Bora     | 0   | 08 | 4.149 <sup>ihedcb</sup>    | 5.192 <sup>bcde</sup>   | 3.396 <sup>vvutsrponmlj</sup>     | 31.254 <sup>lkjihgfc</sup>     | 1.365 <sup>lkjihgf</sup>   | 0.369 <sup>BAzyxwu</sup>         |
| Bora     | 0   | 12 | 6.733 <sup>f</sup>         | 5.906 <sup>bcde</sup>   | 7.908 <sup>kjihgfedc</sup>        | 56.532 <sup>eda</sup>          | 1.908 <sup>kjihgfedc</sup> | 0.201 <sup>CBaz</sup>            |
| Bora     | 0   | 24 | 5.465 <sup>hgfedcba</sup>  | 8.556 <sup>abcde</sup>  | 6.430 <sup>srponmlkijhgfedc</sup> | 43.983 <sup>kiedba</sup>       | 1.766 <sup>kjihgfed</sup>  | 0.570 <sup>vtsrponmlk</sup>      |
| Antonije | 0   | 03 | 5.890 <sup>hgfedcba</sup>  | 9.475 <sup>bcd</sup>    | 7.236 <sup>mkjihgfedc</sup>       | 32.353 <sup>lkjihgfc</sup>     | 1.597 <sup>kjihgfed</sup>  | 0.426 <sup>BAzyxwvutspo</sup>    |
| Antonije | 0   | 08 | 3.982 <sup>ihedcb</sup>    | 5.760 <sup>bcde</sup>   | 7.868 <sup>khgfedc</sup>          | 34.175 <sup>lkjihgfc</sup>     | 1.513 <sup>kjihgfed</sup>  | 0.479 <sup>xwvutsrponm</sup>     |
| Antonije | 0   | 12 | 5.577 <sup>hgfedcba</sup>  | 9.390 <sup>bcd</sup>    | 3.428 <sup>vvutsrponl</sup>       | 34.292 <sup>lkjihgfecb</sup>   | 1.669 <sup>kjihgfed</sup>  | 0.655 <sup>rlkijhg</sup>         |
| Antonije | 0   | 24 | 4.417 <sup>ihgfedcba</sup> | 8.781 <sup>bcde</sup>   | 4.160 <sup>vvutsrponmlji</sup>    | 24.430 <sup>lkjhgfc</sup>      | 1.601 <sup>kjihgfed</sup>  | 0.542 <sup>xwvutsrponml</sup>    |
| Pannonia | 0   | 03 | 5.308 <sup>ihgfedcba</sup> | 10.984 <sup>abcd</sup>  | 3.532 <sup>vvutsrponml</sup>      | 38.336 <sup>lkjihgfedcba</sup> | 1.872 <sup>kjihgfed</sup>  | 0.488 <sup>xwvutsrponml</sup>    |
| Pannonia | 0   | 08 | 5.046 <sup>ihgfedcba</sup> | 9.549 <sup>abcd</sup>   | 8.688 <sup>hgfedc</sup>           | 26.499 <sup>lkjhgfc</sup>      | 2.065 <sup>ijhgfedc</sup>  | 0.639 <sup>tsrponmlkjih</sup>    |
| Pannonia | 0   | 12 | 4.719 <sup>ihgfedcba</sup> | 7.166 <sup>bcde</sup>   | 1.465 <sup>wvu</sup>              | 26.633 <sup>lkjhgfc</sup>      | 1.586 <sup>kjihgfed</sup>  | 0.509 <sup>xwvutsrponml</sup>    |
| Pannonia | 0   | 24 | 5.718 <sup>hgfedcba</sup>  | 8.010 <sup>abcde</sup>  | 6.445 <sup>sponmlkijhgfedc</sup>  | 49.271 <sup>iedba</sup>        | 1.330 <sup>lkjihgf</sup>   | 0.702 <sup>nkjihgf</sup>         |
| PE19/66  | 0   | 03 | 6.579 <sup>gfa</sup>       | 8.156 <sup>bcde</sup>   | 8.774 <sup>hgfedc</sup>           | 24.448 <sup>lkjhgfc</sup>      | 1.677 <sup>kjihgfed</sup>  | 0.525 <sup>xwvutsrponm</sup>     |
| PE19/66  | 0   | 08 | 5.344 <sup>ihgfedcba</sup> | 6.150 <sup>bcde</sup>   | 8.441 <sup>ihgfedc</sup>          | 24.204 <sup>lkjhgfc</sup>      | 1.272 <sup>lkjih</sup>     | 0.713 <sup>lkjihgfe</sup>        |
| PE19/66  | 0   | 12 | 6.193 <sup>hgfedcba</sup>  | 11.215 <sup>abc</sup>   | 3.453 <sup>vvutsrponml</sup>      | 33.233 <sup>lkjihgfc</sup>     | 1.759 <sup>kjihgfed</sup>  | 0.398 <sup>BAzyxwvuts</sup>      |
| PE19/66  | 0   | 24 | 5.918 <sup>hgfedcba</sup>  | 15.344 <sup>a</sup>     | 3.152 <sup>vvutsrponml</sup>      | 57.884 <sup>da</sup>           | 2.424 <sup>gc</sup>        | 0.399 <sup>BAzyxwvuts</sup>      |
| Bora     | 150 | 03 | 5.192 <sup>ihgfedcba</sup> | 10.713 <sup>abcd</sup>  | 1.087 <sup>wv</sup>               | 19.397 <sup>lkjihgfed</sup>    | 2.072 <sup>ijhgfedc</sup>  | 0.910 <sup>gfedcb</sup>          |
| Bora     | 150 | 08 | 4.277 <sup>ihgfedcba</sup> | 10.785 <sup>abcd</sup>  | 3.434 <sup>vvutsrponml</sup>      | 19.428 <sup>lkjihgfed</sup>    | 2.525 <sup>fedc</sup>      | 1.028 <sup>cba</sup>             |
| Bora     | 150 | 12 | 2.674 <sup>ihg</sup>       | 7.175 <sup>bcde</sup>   | 8.872 <sup>hgfedc</sup>           | 21.293 <sup>lkjihgfed</sup>    | 2.683 <sup>edc</sup>       | 0.813 <sup>kjihgfed</sup>        |
| Bora     | 150 | 24 | 4.924 <sup>ihgfedcba</sup> | 7.283 <sup>bcde</sup>   | 2.930 <sup>vvutsrpon</sup>        | 18.761 <sup>lkjihgfe</sup>     | 1.482 <sup>kjihgfed</sup>  | 0.559 <sup>vvutsrponml</sup>     |
| Antonije | 150 | 03 | 3.995 <sup>ihgfedcb</sup>  | 8.893 <sup>abcde</sup>  | 3.106 <sup>vvutsrponml</sup>      | 27.803 <sup>lkjihgfedc</sup>   | 2.247 <sup>ihgfedc</sup>   | 0.705 <sup>nmlkijhgf</sup>       |
| Antonije | 150 | 08 | 4.410 <sup>ihgfedcba</sup> | 10.449 <sup>abcd</sup>  | 5.164 <sup>vutsrponmlkijhg</sup>  | 30.263 <sup>lkjihgfedcb</sup>  | 2.372 <sup>ihgfedc</sup>   | 0.848 <sup>igfedc</sup>          |
| Antonije | 150 | 12 | 4.187 <sup>ihgfedcba</sup> | 8.761 <sup>abcde</sup>  | 8.227 <sup>ihgfedc</sup>          | 18.870 <sup>lkjihgfe</sup>     | 2.094 <sup>ijhgfedc</sup>  | 0.576 <sup>vvutsrponmlk</sup>    |
| Antonije | 150 | 24 | 5.252 <sup>ihgfedcba</sup> | 10.808 <sup>abcd</sup>  | 3.127 <sup>vvutsrponml</sup>      | 25.046 <sup>lkjihgfedc</sup>   | 2.060 <sup>ijhgfedc</sup>  | 0.612 <sup>vvutsrponmlkjh</sup>  |
| Pannonia | 150 | 03 | 5.742 <sup>hgfedcba</sup>  | 9.292 <sup>abcd</sup>   | 5.569 <sup>utsrponmlkijhgf</sup>  | 33.167 <sup>lkjihgfedcb</sup>  | 1.656 <sup>kjihgfed</sup>  | 0.515 <sup>vvutsrponml</sup>     |
| Pannonia | 150 | 08 | 7.829 <sup>cba</sup>       | 11.014 <sup>abcd</sup>  | 2.893 <sup>vvutsrpo</sup>         | 10.785 <sup>lkji</sup>         | 1.409 <sup>lkjihgf</sup>   | 1.218 <sup>a</sup>               |
| Pannonia | 150 | 12 | 3.376 <sup>ihgfe</sup>     | 4.128 <sup>cde</sup>    | 2.644 <sup>vvutsrp</sup>          | 31.063 <sup>lkjihgfedcb</sup>  | 1.222 <sup>lkjihg</sup>    | 0.292 <sup>CBazyx</sup>          |
| Pannonia | 150 | 24 | 5.461 <sup>hgfedcba</sup>  | 8.891 <sup>abcde</sup>  | 3.839 <sup>vvutsrponmlkj</sup>    | 27.807 <sup>lkjihgfedc</sup>   | 1.629 <sup>kjihgfed</sup>  | 0.510 <sup>vvutsrponml</sup>     |
| PE19/66  | 150 | 03 | 5.903 <sup>hgfedcba</sup>  | 9.842 <sup>abcd</sup>   | 1.687 <sup>wvut</sup>             | 16.464 <sup>lkjihgf</sup>      | 1.678 <sup>kjihgfed</sup>  | 0.605 <sup>vvutsrponmlkijh</sup> |
| PE19/66  | 150 | 08 | 5.874 <sup>hgfedcba</sup>  | 12.120 <sup>ab</sup>    | 7.030 <sup>onmlkijhgfedc</sup>    | 16.330 <sup>lkjihgf</sup>      | 2.065 <sup>ijhgfedc</sup>  | 1.093 <sup>cba</sup>             |
| PE19/66  | 150 | 12 | 3.574 <sup>ihgfed</sup>    | 6.854 <sup>bcde</sup>   | 9.689 <sup>ecb</sup>              | 24.395 <sup>lkjihgfedc</sup>   | 1.920 <sup>kjihgfedc</sup> | 0.497 <sup>xwvutsrponml</sup>    |
| PE19/66  | 150 | 24 | 4.524 <sup>ihgfedcba</sup> | 9.428 <sup>abcd</sup>   | 3.682 <sup>vvutsrponmlkj</sup>    | 23.671 <sup>lkjihgfedc</sup>   | 2.088 <sup>ijhgfedc</sup>  | 0.463 <sup>yxwvutsrponml</sup>   |
| Bora     | 300 | 03 | 4.119 <sup>ihgfedcb</sup>  | 9.915 <sup>abcd</sup>   | 2.988 <sup>vvutsrponm</sup>       | 18.695 <sup>lkjihgfe</sup>     | 2.421 <sup>hgfedc</sup>    | 0.217 <sup>CBzy</sup>            |
| Bora     | 300 | 08 | 4.185 <sup>ihgfedcba</sup> | 7.674 <sup>abcde</sup>  | 3.164 <sup>vvutsrponml</sup>      | 18.854 <sup>lkjihgfe</sup>     | 1.842 <sup>kjihgfed</sup>  | 0.523 <sup>xwvutsrponml</sup>    |
| Bora     | 300 | 12 | 2.947 <sup>ihgfe</sup>     | 9.214 <sup>abcd</sup>   | 3.030 <sup>vvutsrponml</sup>      | 24.869 <sup>lkjihgfedc</sup>   | 3.132 <sup>cb</sup>        | 0.177 <sup>CB</sup>              |
| Bora     | 300 | 24 | 4.538 <sup>ihgfedcba</sup> | 6.881 <sup>bcde</sup>   | 6.418 <sup>sponmlkijhgfedc</sup>  | 21.625 <sup>lkjihgfedc</sup>   | 1.517 <sup>kjihgfed</sup>  | 0.439 <sup>Axwvutsrpo</sup>      |

|              |    |       |            |        |       |        |                      |        |               |       |            |       |                  |
|--------------|----|-------|------------|--------|-------|--------|----------------------|--------|---------------|-------|------------|-------|------------------|
| Antonije 300 | 03 | 3.647 | ihg fed    | 9.794  | abcd  | 9.507  | fedcb                | 22.517 | lkjihg fed    | 2.702 | dc b       | 0.386 | BAzyxwvut        |
| Antonije 300 | 08 | 4.927 | ihg fedcba | 9.366  | abcd  | 5.162  | vvut srponmlkjihg f  | 20.848 | lkjihg fed    | 1.901 | kjihg fedc | 0.498 | xwvut srponml    |
| Antonije 300 | 12 | 4.684 | ihg fedcba | 8.122  | abcde | 3.770  | vvut srponmlkj       | 47.805 | ihg fedcba    | 1.734 | kjihg fed  | 0.565 | wvut srponmlk    |
| Antonije 300 | 24 | 2.957 | ihg fe     | 11.474 | abc   | 5.871  | tsrponmlkjihg fed    | 60.136 | cba           | 3.957 | b          | 0.457 | Azyxwvut srponml |
| Pannonia 300 | 03 | 6.297 | hg fedcba  | 7.540  | bcde  | 9.085  | g fedc               | 28.982 | lkjihg fedcb  | 1.205 | lkjihg     | 0.520 | xwvut srponml    |
| Pannonia 300 | 08 | 6.949 | fedcba     | 11.049 | abcd  | 4.820  | vvut srponmlkjihg    | 29.505 | lkjihg fedcb  | 1.590 | kjihg fedc | 0.940 | fedcb            |
| Pannonia 300 | 12 | 3.316 | ihg fe     | 3.791  | cde   | 8.333  | ihg fedc             | 31.589 | lkjihg fedcb  | 1.146 | lkji       | 0.109 | C                |
| Pannonia 300 | 24 | 4.387 | ihg fedcba | 8.856  | abcde | 1.955  | vvut                 | 51.951 | g fedcba      | 2.016 | ihg fedc   | 0.592 | wvut srponmlkj   |
| PE19/66 300  | 03 | 5.194 | ihg fedcba | 10.763 | abcd  | 0.628  | w                    | 15.786 | lkjihg f      | 2.077 | ihg fedc   | 0.660 | rponmlkjihg      |
| PE19/66 300  | 08 | 6.678 | hg fedcba  | 12.153 | ab    | 2.187  | vvut sr              | 33.277 | lkjihg fedcb  | 1.820 | kjihg fed  | 1.114 | ba               |
| PE19/66 300  | 12 | 3.538 | ihg fed    | 3.374  | de    | 4.338  | vvut srponmlkji      | 24.449 | lkjihg fedc   | 0.955 | lkj        | 0.378 | BAzyxwvu         |
| PE19/66 300  | 24 | 4.519 | ihg fedcba | 7.229  | bcde  | 4.880  | vvut srponmlkjihg    | 32.944 | lkjihg fedcb  | 1.604 | kjihg fed  | 0.386 | BAzyxwvut        |
| Bora 450     | 03 | 4.413 | ihg fedcba | 6.955  | bcde  | 10.599 | cb                   | 73.418 | a             | 1.585 | kjihg fed  | 0.645 | srponmlkji       |
| Bora 450     | 08 | 5.729 | hg fedcba  | 4.406  | bcde  | 7.301  | lkjihg fedc          | 10.503 | lkj           | 0.772 | lk         | 0.849 | hg fedc          |
| Bora 450     | 12 | 4.301 | ihg fedcba | 7.151  | bcde  | 26.112 | a                    | 23.368 | lkjihg fedc   | 1.662 | kjihg fed  | 0.672 | okjihg           |
| Bora 450     | 24 | 4.293 | ihg fedcba | 9.974  | abcd  | 7.207  | nmlkjihg fedc        | 12.090 | lkjih         | 2.323 | ihg fedc   | 0.466 | yxwvut srpnml    |
| Antonije 450 | 03 | 1.427 | i          | 7.761  | abcde | 3.187  | vvut srponml         | 54.201 | fba           | 5.462 | a          | 0.483 | xwvut srponml    |
| Antonije 450 | 08 | 7.503 | dcba       | 1.263  | e     | 9.966  | dc b                 | 39.588 | lkjihg fedcba | 0.168 | l          | 1.067 | dcba             |
| Antonije 450 | 12 | 3.931 | ihg fedc   | 7.501  | bcde  | 5.222  | vvut srponmlkjihg fd | 24.269 | lkjihg fedc   | 1.911 | kjihg fedc | 0.202 | CBAz             |
| Antonije 450 | 24 | 5.177 | ihg fedcba | 10.473 | abcd  | 4.832  | vvut srponmlkjihg    | 22.010 | lkjihg edc    | 2.021 | ihg fedc   | 0.623 | wvut srponmlkjih |
| Pannonia 450 | 03 | 7.962 | ba         | 10.198 | abcd  | 2.894  | vvut srpo            | 17.729 | lkjig f       | 1.281 | lkjihg     | 0.393 | BAzyxwvts        |
| Pannonia 450 | 08 | 6.247 | hg fedcba  | 9.047  | abcde | 4.668  | vvut srponmlkji h    | 7.605  | lk            | 1.449 | kjihg fe   | 0.837 | jg fedc          |
| Pannonia 450 | 12 | 6.552 | hg fedcba  | 9.176  | abcd  | 5.010  | vvut srponmlkjihg    | 49.677 | hedcba        | 1.401 | lkjihg f   | 0.678 | rponmlkjihg      |
| Pannonia 450 | 24 | 4.544 | ihg fedcba | 7.868  | abcde | 3.347  | vvut srponml         | 66.646 | ba            | 1.740 | kjihg fed  | 0.598 | urponmlkih       |
| PE19/66 450  | 03 | 4.621 | ihg fedcba | 4.077  | cde   | 6.604  | ponmlkjihg fedc      | 24.010 | lkjihg fedc   | 0.889 | lkj        | 1.089 | cba              |
| PE19/66 450  | 08 | 8.164 | a          | 5.817  | bcde  | 4.341  | vvut srponmlkji      | 8.715  | lk            | 0.717 | lk         | 1.018 | dcba             |
| PE19/66 450  | 12 | 5.732 | hg fedcba  | 9.261  | abcd  | 13.628 | b                    | 33.281 | lkjihg fedcb  | 1.617 | kjihg fed  | 0.588 | wvut srponmlkj   |
| PE19/66 450  | 24 | 6.554 | hg fedcba  | 11.100 | abcd  | 2.719  | vvut srp             | 30.509 | lkjihg fedcb  | 1.696 | kjihg fed  | 0.963 | edcba            |

<sup>1)</sup> Labels of biochemical parameter: DPPH - DPPH scavenging activity; TPC - Total phenolics content; TFC - Total flavonoids content; PC - Prolin content; GBC - Glicine betain content; FPR - Flavonoides/Phenolics ratio

Table S3. F-test for tolerance indeces based on examined biochemical parameters in black poplar clones on different concentrations of NaCl

| Sources of variation    | Biochemical parameters <sup>*)</sup> |           |            |             |            |           |
|-------------------------|--------------------------------------|-----------|------------|-------------|------------|-----------|
|                         | DPPHTI                               | TPCTI     | TFCTI      | PCTI        | GBCTI      | FPRTI     |
| Clone (A)               | 1002.32 **                           | 89.83 **  | 226.16 **  | 10499.8 **  | 166515 **  | 69.64 **  |
| Salt concentration (B)  | 432.36 **                            | 88.96 **  | 171.88 **  | 4550.9 **   | 189856 **  | 139.8 **  |
| Interaction A×B         | 280.81 **                            | 3.66 **   | 62.39 **   | 9834.9 **   | 40070 **   | 36.07 **  |
| Time of measurement (R) | 1447.97 **                           | 568.38 ** | 1407.86 ** | 204640.1 ** | 4102332 ** | 31.41 **  |
| Interaction A×R         | 48.62 **                             | 36.66 **  | 380.09 **  | 13665.2 **  | 7490816 ** | 127.79 ** |
| Interaction B×R         | 389.11 **                            | 75.09 **  | 128.71 **  | 72255.2 **  | 9800779 ** | 188.69 ** |
| Interaction A×B×R       | 120.42 **                            | 37.72 **  | 46.68 **   | 32845.4 **  | 5569091 ** | 79.92 **  |

<sup>\*)</sup> Labels of tolerance indeces based on biochemical parameter: DPPHTI - DPPH scavenging activity tolerance index; TPCTI - Total phenolics content tolerance index; TFCTI - Total flavonoids content tolerance index; PCTI - Prolin content tolerance index; GBCTI - Glicine betain content tolerance index; FPRTI - Flavonoides/Phenolics ratio tolerance index

Table S4. Tukey HSD test for tolerance indices of biochemical parameters in black poplar clones on examined salt concentrations in the first 24 hours

| Clone    | c(NaCl) (mM) | Time (hours) | Biochemical parameters <sup>*)</sup> |         |         |         |         |
|----------|--------------|--------------|--------------------------------------|---------|---------|---------|---------|
|          |              |              | DPPHTI                               | TPCTI   | TFCTI   | PCTI    | GBCTI   |
| Bora     |              |              | 1.490 a                              | 0.845 c | 1.244 a | 1.623 a | 0.696 d |
| Antonije |              |              | 1.199 b                              | 0.925 b | 1.087 b | 1.088 c | 1.077 a |

|          |     |          |           |          |         |         |            |
|----------|-----|----------|-----------|----------|---------|---------|------------|
| Pannonia |     | 1.055 c  | 1.105 a   | 1.050 b  | 1.403 b | 0.923 b | 0.929 b    |
| PE19/66  |     | 1.455 a  | 0.915 b   | 0.897 c  | 1.041 d | 0.724 c | 0.960 b    |
| 150      |     | 1.446 a  | 0.920 b   | 1.193 a  | 0.971 c | 0.687 c | 1.280 a    |
| 300      |     | 0.983 b  | 0.867 c   | 1.101 b  | 1.214 b | 0.929 b | 1.258 a    |
| 450      |     | 1.470 a  | 1.054 a   | 0.915 c  | 1.682 a | 0.949 a | 0.987 b    |
| 03       |     | 1.276 b  | 0.868 b   | 0.888 c  | 1.159 b | 0.998 a | 1.195 b    |
| 08       |     | 1.897 a  | 1.308 a   | 1.599 a  | 0.817 d | 0.703 d | 1.261 a    |
| 12       |     | 0.952 d  | 0.721 c   | 0.800 d  | 2.249 a | 0.881 b | 1.184 b    |
| 24       |     | 1.073 c  | 0.892 b   | 0.991 b  | 0.930 c | 0.838 c | 1.058 c    |
| Bora     | 150 | 2.010 a  | 0.840 de  | 1.455 a  | 0.802 i | 0.546 k | 1.713 a    |
| Bora     | 300 | 0.843 i  | 0.774 e   | 1.275 b  | 0.998 g | 0.567 j | 1.670 a    |
| Bora     | 450 | 1.617 c  | 0.920 cd  | 1.001 de | 3.069 a | 0.974 e | 0.894 de   |
| Antonije | 150 | 1.406 d  | 0.932 cd  | 1.252 b  | 1.059 f | 0.830 f | 1.300 bc   |
| Antonije | 300 | 0.953 h  | 0.841 de  | 1.231 b  | 1.110 e | 1.290 a | 1.447 b    |
| Antonije | 450 | 1.240 e  | 1.001 bc  | 0.779 f  | 1.096 e | 1.111 b | 1.406 b    |
| Pannonia | 150 | 1.101 g  | 1.076 b   | 1.040 cd | 0.926 h | 0.751 g | 0.919 de   |
| Pannonia | 300 | 0.922 hi | 1.008 bc  | 0.987 de | 2.032 b | 1.027 c | 0.944 d    |
| Pannonia | 450 | 1.141 fg | 1.230 a   | 1.123 c  | 1.252 d | 0.992 d | 0.923 de   |
| PE19/66  | 150 | 1.270 e  | 0.835 de  | 1.023 d  | 1.096 e | 0.623 i | 1.186 c    |
| PE19/66  | 300 | 1.214 ef | 0.844 de  | 0.910 e  | 0.715 j | 0.831 f | 0.970 d    |
| PE19/66  | 450 | 1.881 b  | 1.066 b   | 0.757 f  | 1.311 c | 0.718 h | 0.724 e    |
| Bora     | 03  | 0.993 g  | 0.908 ef  | 1.164 d  | 2.579 b | 1.455 b | 1.095 cdef |
| Bora     | 08  | 2.763 a  | 1.140 d   | 1.978 a  | 1.364 f | 0.520 m | 1.812 b    |
| Bora     | 12  | 1.347 e  | 0.491 j   | 0.892 f  | 1.602 e | 0.410 o | 1.770 b    |
| Bora     | 24  | 0.856 hi | 0.839 fgh | 0.941 ef | 0.947 j | 0.398 p | 1.026 def  |
| Antonije | 03  | 1.233 f  | 0.513 j   | 0.930 ef | 0.701 l | 1.077 d | 2.173 a    |
| Antonije | 08  | 1.677 c  | 1.410 a   | 1.220 cd | 0.860 k | 0.885 f | 0.978 fg   |
| Antonije | 12  | 0.741 j  | 0.765 hi  | 0.904 f  | 1.685 d | 0.884 g | 1.197 cd   |
| Antonije | 24  | 1.147 f  | 1.010 e   | 1.296 c  | 1.108 h | 1.463 a | 1.189 cd   |
| Pannonia | 03  | 0.849 hi | 1.256 c   | 0.871 f  | 0.992 i | 0.695 k | 0.725 h    |
| Pannonia | 08  | 1.637 c  | 1.389 ab  | 1.567 b  | 0.510 n | 0.602 l | 1.049 cdef |
| Pannonia | 12  | 0.798 ij | 0.936 ef  | 0.748 g  | 3.638 a | 1.406 c | 0.770 h    |
| Pannonia | 24  | 0.934 gh | 0.839 fgh | 1.014 e  | 0.473 o | 0.990 e | 1.172 cde  |
| PE19/66  | 03  | 2.031 b  | 0.796 ghi | 0.587 i  | 0.364 p | 0.767 j | 0.787 h    |
| PE19/66  | 08  | 1.509 d  | 1.292 bc  | 1.631 b  | 0.535 m | 0.803 i | 1.206 c    |
| PE19/66  | 12  | 0.924 gh | 0.691 i   | 0.655 gh | 2.070 c | 0.824 h | 0.999 ef   |
| PE19/66  | 24  | 1.356 e  | 0.879 fg  | 0.713 g  | 1.193 g | 0.502 n | 0.847 gh   |
| 150      | 03  | 1.417 b  | 0.922 cd  | 0.974 cd | 0.534 k | 0.789 f | 1.099 efg  |
| 150      | 08  | 2.213 a  | 1.197 b   | 2.062 a  | 0.715 i | 0.647 i | 1.722 a    |
| 150      | 12  | 1.129 d  | 0.610 g   | 0.756 e  | 1.879 c | 0.707 h | 1.314 bc   |
| 150      | 24  | 1.026 e  | 0.952 c   | 0.979 cd | 0.755 h | 0.606 j | 0.983 g    |
| 300      | 03  | 0.977 ef | 0.853 de  | 0.947 d  | 1.115 e | 0.707 h | 1.215 cde  |
| 300      | 08  | 1.488 b  | 1.218 b   | 1.816 b  | 0.611 j | 0.925 e | 1.446 b    |
| 300      | 12  | 0.580 g  | 0.638 g   | 0.697 e  | 2.038 b | 0.939 d | 1.165 def  |
| 300      | 24  | 0.886 f  | 0.758 f   | 0.944 d  | 1.091 f | 1.144 b | 1.205 cdef |
| 450      | 03  | 1.435 b  | 0.830 ef  | 0.744 e  | 1.828 d | 1.498 a | 1.272 cd   |
| 450      | 08  | 1.990 a  | 1.508 a   | 0.919 d  | 1.127 e | 0.535 k | 0.617 h    |
| 450      | 12  | 1.147 d  | 0.914 cde | 0.946 d  | 2.829 a | 0.997 c | 1.072 fg   |
| 450      | 24  | 1.308 c  | 0.965 c   | 1.050 c  | 0.945 g | 0.764 g | 0.986 g    |

\*) Labels of tolerance indeces based on biochemical parameter: DPPHTI - DPPH scavenging activity tolerance index; TPCTI - Total phenolics content tolerance index; TFCTI - Total flavonoids content

tolerance index; PCTI - Prolin content tolerance index; GBCTI - Glicine betain content tolerance index; FPRTI - Flavonoides/Phenolics ratio tolerance index

Table S5. Tukey HSD test analyses of expression data in different black poplar clones

| Clone   | Treatment | Time | <i>PtP5CS</i> |   | <i>PtGRAS17</i> |     | <i>PtGRAS16</i> |       | <i>PtSOS1</i> |   | <i>PtDREB2</i> |   |
|---------|-----------|------|---------------|---|-----------------|-----|-----------------|-------|---------------|---|----------------|---|
| B-229   | 150 mM    | 3h   | 0.125         | a | 1.000           | e   | 0.028           | i     | 0.230         | b | 0.462          | b |
| B-229   | 150 mM    | 8h   | 0.325         | a | 1.000           | e   | 0.057           | i     | 0.652         | b | 0.574          | b |
| B-229   | 150 mM    | 24h  | 0.184         | a | 1.000           | e   | 0.018           | i     | 0.181         | b | 0.665          | b |
| B-229   | 300 mM    | 3h   | 1.097         | a | 1.000           | e   | 0.019           | i     | 0.191         | b | 0.170          | b |
| B-229   | 300 mM    | 8h   | 0.147         | a | 1.000           | e   | 0.127           | i     | 0.748         | b | 0.182          | b |
| B-229   | 300 mM    | 24h  | 0.213         | a | 1.000           | e   | 0.062           | i     | 0.662         | b | 0.179          | b |
| B-229   | 450 mM    | 3h   | 0.113         | a | 1.000           | e   | 0.014           | i     | 0.509         | b | 0.224          | b |
| B-229   | 450 mM    | 8h   | 1.000         | a | 1.000           | e   | 1.000           | i     | 1.000         | b | 1.000          | b |
| B-229   | 450 mM    | 24h  | 0.924         | a | 1.000           | e   | 0.051           | i     | 0.402         | b | 0.414          | b |
| 182/81  | 150 mM    | 3h   | 1.161         | a | 17.13           | b   | 9.239           | efghi | 4.066         | b | 0.526          | b |
| 182/81  | 150 mM    | 8h   | 0.534         | a | 0.053           | e   | 2.178           | i     | 2.615         | b | 0.155          | b |
| 182/81  | 150 mM    | 24h  | 3.260         | a | 0.591           | e   | 2.320           | i     | 35.273        | b | 0.051          | b |
| 182/81  | 300 mM    | 3h   | 1.364         | a | 26.69           | a   | 1.969           | i     | 2.774         | b | 0.193          | b |
| 182/81  | 300 mM    | 8h   | 2.187         | a | 1.000           | e   | 63.108          | d     | 28.886        | b | 1.662          | b |
| 182/81  | 300 mM    | 24h  | 0.602         | a | 0.060           | e   | 0.280           | i     | 1.546         | b | 0.546          | b |
| 182/81  | 450 mM    | 3h   | 1.575         | a | 1.325           | e   | 0.927           | i     | 6.950         | b | 2.269          | b |
| 182/81  | 450 mM    | 8h   | 2.530         | a | 5.264           | cde | 152.45          | b     | 80.71         | b | 10.12          | b |
| 182/81  | 450 mM    | 24h  | 1.287         | a | 0.157           | e   | 5.530           | fghi  | 4.016         | b | 2.217          | b |
| M1      | 150 mM    | 3h   | 1.225         | a | 3.438           | e   | 1.536           | i     | 1.235         | b | 0.912          | b |
| M1      | 150 mM    | 8h   | 3.650         | a | 1.171           | e   | 13.521          | efghi | 0.829         | b | 0.107          | b |
| M1      | 150 mM    | 24h  | 4.362         | a | 16.66           | b   | 2.589           | hi    | 4.684         | b | 1.046          | b |
| M1      | 300 mM    | 3h   | 3.060         | a | 2.261           | e   | 4.091           | ghi   | 1.056         | b | 0.132          | b |
| M1      | 300 mM    | 8h   | 2.245         | a | 0.585           | e   | 5.718           | fghi  | 1.186         | b | 0.032          | b |
| M1      | 300 mM    | 24h  | 6.742         | a | 14.56           | bc  | 1.453           | i     | 7.140         | b | 4.506          | b |
| M1      | 450 mM    | 3h   | 4.218         | a | 12.54           | bcd | 5.668           | fghi  | 6.132         | b | 2.136          | b |
| M1      | 450 mM    | 8h   | 3.804         | a | 5.523           | de  | 1.319           | i     | 3.659         | b | 2.366          | b |
| M1      | 450 mM    | 24h  | 2.602         | a | 4.984           | de  | 1.994           | i     | 1.808         | b | 1.778          | b |
| PE19/66 | 150       | 3h   | 3.583         | a | 1.251           | e   | 24.095          | ef    | 3.125         | b | 1.880          | b |
| PE19/66 | 150       | 8h   | 7.772         | a | 3.611           | e   | 220.28          | a     | 12.212        | b | 1.629          | b |
| PE19/66 | n150      | 24h  | 2.628         | a | 0.691           | e   | 52.964          | d     | 2.895         | b | 0.384          | b |
| PE19/66 | n300      | 3h   | 14.989        | a | 1.314           | e   | 26.530          | e     | 25.347        | b | 3.227          | b |
| PE19/66 | n300      | 8h   | 8.672         | a | 2.597           | e   | 54.378          | d     | 7.546         | b | 1.518          | b |
| PE19/66 | n300      | 24h  | 2.880         | a | 1.205           | e   | 21.415          | efg   | 3.330         | b | 1.278          | b |
| PE19/66 | n450      | 3h   | 5.352         | a | 1.046           | e   | 17.593          | efghi | 2.027         | b | 1.062          | b |
| PE19/66 | n450      | 8h   | 9.022         | a | 2.510           | e   | 21.108          | egfh  | 2.333         | b | 1.354          | b |
| PE19/66 | n450      | 24h  | 2.701         | a | 1.254           | e   | 100.77          | c     | 2.450         | b | 1.295          | b |

Tukey HSD test analyses of expression data performed using  $2^{-\Delta\Delta C_t}$  value distribution of *PtP5CS1*, *PtSOS1*, *PtGRAS16*, *PtGRAS17*, *PtDREB2* genes induced by salt (NaCl) treatment at various concentrations (150 mM, 300 mM and 450 mM) and differing treatment duration (3h, 8h, 24h) in poplar clones (Bora-B229, Antonije-182/81, Pannonia-M1 and PE19/66). Treatments that have the same letter belong to the same homogenous group at the level of  $\alpha=0.05$  (the same letter stands for

the treatments that are not statistically significant). Number 1.000 stands for a missing value. These tests were performed in STATISTICA 13 software [56].
